# Supplementary material for: A PHREEQC-Based Tool for Planning and Control of In Situ Chemical Oxidation Treatment
Source: MDPI journal article supplement (doi:10.3390/app14093600), 2024-04-24
Supplement: s1 [file s1]

Table\_1\_suppl

Simple outcomes from the tool, a set of equations and reactions

| Parameters:                                                 | Equation/reaction used in the calculation                                                                                                                                                                                                                                    |
|-------------------------------------------------------------|------------------------------------------------------------------------------------------------------------------------------------------------------------------------------------------------------------------------------------------------------------------------------|
| Radius of influence / Total flow path in model              | $\lg R = \frac{k(h^2 - H^2)}{0.733Q} + \lg r$ <p>Where<br/> R – radius of influence,<br/> k – hydraulic conductivity,<br/> h – water table level after the injection,<br/> H – water table level before the injection,<br/> Q – injection rate,<br/> r – radius of well.</p> |
| Total bulk treatment volume                                 | $V = Am, \text{ where } A = \pi R^2$ <p>Where<br/> V – total bulk treatment volume,<br/> A – area,<br/> R – ROI (radius of influence),<br/> m – thickness of polluted layer.</p>                                                                                             |
| Maximum oxidant concentration                               | $C_{\max} = M_{ox} * 1000000 / V_{liq} * 1000$ <p>Where<br/> C<sub>max</sub> – maximum concentration of oxidant,<br/> M<sub>ox</sub> – mass of the injected oxidant(real data in kg),<br/> V<sub>liq</sub> – volume of injected liquid in m<sup>3</sup>.</p>                 |
| Mass of porous media                                        | $M = dV$ <p>Where<br/> M – mass of porous medium,<br/> V – total bulk treatment volume,<br/> d – dry bulk density.</p>                                                                                                                                                       |
| Volume of oxidant to be delivered                           | $V_{ox} = Vn$ <p>Where<br/> V<sub>ox</sub> – volume of oxidant must be delivered,<br/> V – total bulk treatment volume,<br/> n – porosity.</p>                                                                                                                               |
| Dose of oxidant                                             | $D = (C_{\max} V_{ox}) / M$ <p>Where<br/> D - dose of oxidant,<br/> V<sub>ox</sub> – volume of oxidant must be delivered,<br/> C<sub>max</sub> – maximum concentration of oxidant,<br/> M – mass of porous medium.</p>                                                       |
| Effective porosity, usually 10 to 48% smaller than porosity | $n_e = (0.1 \div 0.48)n$                                                                                                                                                                                                                                                     |

|                                                     |                                                                                                                                                                                                                                                                                                                                                                                                                                        |
|-----------------------------------------------------|----------------------------------------------------------------------------------------------------------------------------------------------------------------------------------------------------------------------------------------------------------------------------------------------------------------------------------------------------------------------------------------------------------------------------------------|
|                                                     | <p>Where</p> <p><math>n_e</math> – effective porosity,</p> <p><math>n</math> – porosity.</p>                                                                                                                                                                                                                                                                                                                                           |
| Velocity of water for max effective porosity        | $v_{\min} = kI / n_{e\max}, \text{ where } I = \text{delta}H / R$ <p>Where</p> <p><math>v_{\min}</math> – minimum velocity,</p> <p><math>I</math> – hydraulic gradient,</p> <p><math>\text{delta}H</math> – pressure equal <math>(703,069679 \cdot \text{pressure in psi}) / 1000</math>,</p> <p><math>n_{e\max}</math> – maximum effective porosity,</p> <p><math>k</math> – hydraulic conductivity,</p> <p><math>R</math> – ROI.</p> |
| Velocity of water for min effective porosity        | $v_{\max} = kI / n_{e\min}, \text{ where } I = \text{delta}H / R$ <p>Where</p> <p><math>v_{\max}</math> – maximum velocity,</p> <p><math>I</math> – hydraulic gradient,</p> <p><math>\text{delta}H</math> – pressure equal <math>(703,069679 \cdot \text{pressure in psi}) / 1000</math>,</p> <p><math>n_{e\min}</math> – minimum effective porosity,</p> <p><math>k</math> – hydraulic conductivity,</p> <p><math>R</math> – ROI.</p> |
| pE of groundwater                                   | $pe = (Eh * 96485) / (2.303 * 8.314 * (283.15 + T))$ <p>Where</p> <p><math>T</math> – temperature in Celsius degrees,</p> <p><math>Eh</math> – oxidation-reduction potential in V.</p>                                                                                                                                                                                                                                                 |
| Time of reaching the ROI for max effective porosity | $t_{\max} = R / v_{\min}$ <p>Where</p> <p><math>t_{\max}</math> – maximum time of reaching ROI,</p> <p><math>R</math> – ROI,</p> <p><math>v_{\min}</math> – minimum velocity.</p>                                                                                                                                                                                                                                                      |
| Time of reaching ROI for min effective porosity     | $t_{\min} = R / v_{\max}$ <p>Where</p> <p><math>t_{\min}</math> – minimum time of reaching ROI,</p> <p><math>R</math> – ROI,</p> <p><math>v_{\max}</math> – maximum velocity.</p>                                                                                                                                                                                                                                                      |
| Number of wells for max effective porosity          | $N_{\min} = V_{ox} / Qt_{\max}$ <p>Where</p> <p><math>N_{\min}</math> – minimum number of wells,</p> <p><math>V_{ox}</math> – volume of oxidant must be delivered,</p> <p><math>Q</math> – injection rate,</p> <p><math>t_{\max}</math> – maximum time of reaching ROI.</p>                                                                                                                                                            |
| Numbers of wells for min effective porosity         | $N_{\max} = V_{ox} / Qt_{\min}$ <p>Where</p>                                                                                                                                                                                                                                                                                                                                                                                           |

|                                                                                                         |                                                                                                                                                                                                                                                                                                |
|---------------------------------------------------------------------------------------------------------|------------------------------------------------------------------------------------------------------------------------------------------------------------------------------------------------------------------------------------------------------------------------------------------------|
|                                                                                                         | $N_{\max}$ – maximum number of wells,<br>$V_{\text{ox}}$ – volume of oxidant must be delivered,<br>$Q$ – injection rate,<br>$t_{\min}$ – minimum time of reaching ROI.                                                                                                                         |
| Mass of $\text{KMnO}_4$ oxidant needed for calculated amount of pollutant [kg] (stoichiometric ratios): |                                                                                                                                                                                                                                                                                                |
| Toluene                                                                                                 | $\text{C}_7\text{H}_8 + 2\text{H}^+ + 2\text{MnO}_4^- = \text{C}_7\text{H}_6\text{O}_2 + 2\text{MnO}_2 + 2\text{H}_2\text{O}$<br>$Y_{\text{MnO}_4^-/\text{Toluene}} = (2 \cdot 118.9)/(1 \cdot 92.14) = 2.58 \text{ (mg/mg)}$                                                                  |
| Ethylbenzene                                                                                            | $\text{C}_6\text{H}_5\text{CH}_2\text{CH}_3 + 4\text{MnO}_4^- + 4\text{HCl} = \text{C}_6\text{H}_5\text{CO}_2\text{H} + \text{CO}_2 + 4\text{MnO}_2 + 4\text{KCl} + 4\text{H}_2\text{O}$<br>$Y_{\text{MnO}_4^-/\text{Ethylbenzene}} = (4 \cdot 118.9)/(1 \cdot 106.17) = 4.48 \text{ (mg/mg)}$ |
| Benzene                                                                                                 | $\text{C}_6\text{H}_6 + 10\text{MnO}_4^- + 10\text{H}^+ = 10\text{MnO}_2 + 6\text{CO}_2 + 8\text{H}_2\text{O}$<br>$Y_{\text{MnO}_4^-/\text{Benzene}} = (10 \cdot 118.9)/(1 \cdot 78.11) = 15.22 \text{ (mg/mg)}$                                                                               |
| PCE                                                                                                     | $3\text{C}_2\text{Cl}_4 + 4\text{MnO}_4^- + 4\text{H}_2\text{O} = 6\text{CO}_2 + 12\text{Cl}^- + 4\text{MnO}_2 + 8\text{H}^+$<br>$Y_{\text{MnO}_4^-/\text{Pce}} = (4 \cdot 118.9)/(3 \cdot 165.7) = 0.96 \text{ (mg/mg)}$                                                                      |
| TCE                                                                                                     | $\text{C}_2\text{Cl}_3\text{H} + 2\text{MnO}_4^- = 2\text{CO}_2 + 3\text{Cl}^- + 2\text{MnO}_2 + \text{H}^+$<br>$Y_{\text{MnO}_4^-/\text{Tce}} = (2 \cdot 118.9)/131.29 = 1.81 \text{ (mg/mg)}$                                                                                                |
| DCE                                                                                                     | $3\text{C}_2\text{Cl}_2\text{H}_2 + 8\text{MnO}_4^- = 2\text{CO}_2 + 3\text{Cl}^- + 2\text{MnO}_2 + \text{H}^+$<br>$Y_{\text{MnO}_4^-/\text{Dce}} = (8 \cdot 118.9)/(3 \cdot 96.88) = 3.27 \text{ (mg/mg)}$                                                                                    |
| VC                                                                                                      | $3\text{C}_2\text{H}_3\text{Cl} + 10\text{MnO}_4^- = 6\text{CO}_2 + 10\text{MnO}_2 + 7\text{OH}^- + 3\text{Cl}^- + \text{H}_2\text{O}$<br>$Y_{\text{MnO}_4^-/\text{Vc}} = (10 \cdot 118.9)/(3 \cdot 62.47) = 6.34 \text{ (mg/mg)}$                                                             |
| NOD                                                                                                     | $3\text{C}_7\text{H}_8\text{O}_4 + 28\text{MnO}_4^- + 28\text{H}^+ = 21\text{CO}_2 + 28\text{MnO}_2 + 26\text{H}_2\text{O}$<br>$Y_{\text{MnO}_4^-/\text{NOM}} = (28 \cdot 118.9)/(3 \cdot 156.07) = 7.11 \text{ (mg/mg)}$                                                                      |
| TOTAL                                                                                                   | Total mass of permanganate used for oxidation of COCs and NOD according to reactions described above                                                                                                                                                                                           |
